# Supplementary material for: Controlling the behaviour of Drosophila melanogaster via smartphone optogenetics
Source: PubMed Central journal article supplement (PMC7572528; doi:10.1038/s41598-020-74448-4), 2020-10-19
Supplement: 41598_2020_74448_MOESM2_ESM.pdf [file 41598_2020_74448_MOESM2_ESM.pdf]

## Supplementary Information

### Controlling the behaviour of *Drosophila melanogaster* via smartphone optogenetics

Ilenia Meloni,<sup>1</sup> Divya Sachidanandan,<sup>2,3</sup> Andreas S. Thum,<sup>4</sup> Robert J. Kittel,<sup>2,3</sup> and Caroline Murawski<sup>1\*</sup>

1 Kurt-Schwabe-Institut für Mess- und Sensortechnik Meinsberg e.V., Kurt-Schwabe-Str. 4, 04736 Waldheim, Germany

2 Department of Animal Physiology, Institute of Biology, Universität Leipzig, Talstr. 33, 04103 Leipzig, Germany

3 Carl-Ludwig-Institute for Physiology, Leipzig University, Liebigstraße 27, 04103 Leipzig, Germany

4 Department of Genetics, Institute of Biology, Universität Leipzig, Talstr. 33, 04103 Leipzig, Germany

\* Corresponding author: [caroline.murawski@ksi-meinsberg.de](mailto:caroline.murawski@ksi-meinsberg.de)

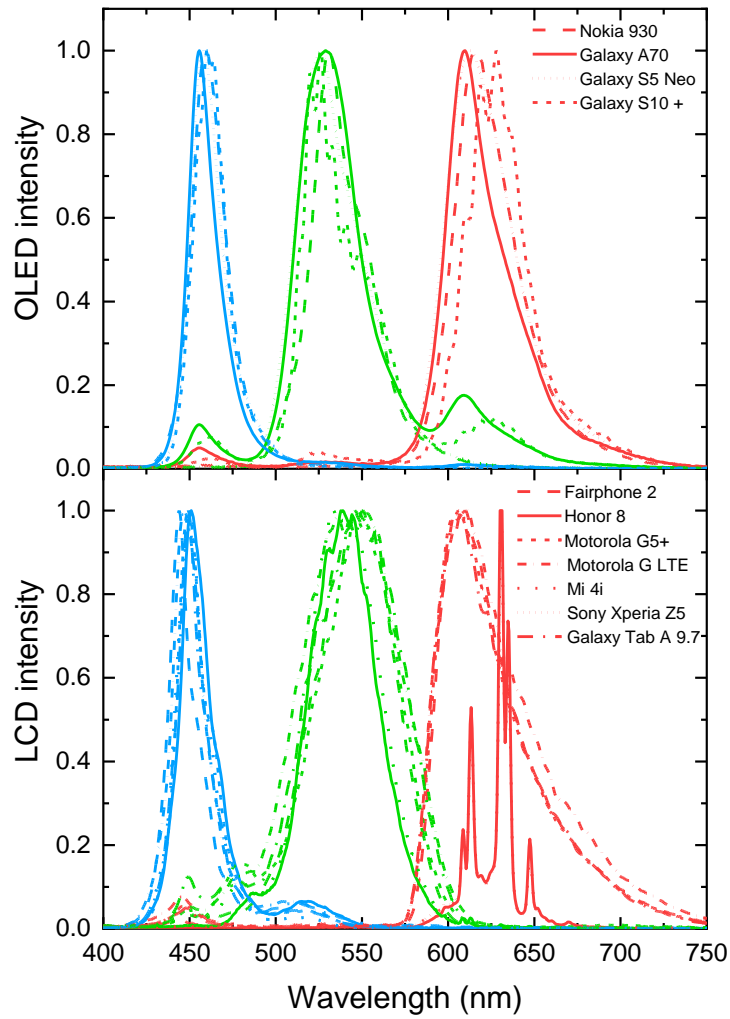

**Figure S1. Emission spectra of selected OLED (top) and LCD (bottom) smartphone displays.** Curves display measurements when turning on individual colours, given by RGB values: (0,0,255; blue), (0,255,0; green), and (255,0,0; red).

**Table S1. Characteristics of different smartphone and tablet displays including power density and pixel area of each sub-pixel (RGB), total number of pixels, resolution, display technology, and thickness of the cover glass.**

| Smartphone                        | Red                                         |                        | Green                                       |                        | Blue                                        |                        | White                                       | Pixels      | Resolution (ppi) | Technology | Glass thickness (mm) |
|-----------------------------------|---------------------------------------------|------------------------|---------------------------------------------|------------------------|---------------------------------------------|------------------------|---------------------------------------------|-------------|------------------|------------|----------------------|
|                                   | Power density ( $\mu\text{W}/\text{mm}^2$ ) | Area ( $\text{mm}^2$ ) | Power density ( $\mu\text{W}/\text{mm}^2$ ) | Area ( $\text{mm}^2$ ) | Power density ( $\mu\text{W}/\text{mm}^2$ ) | Area ( $\text{mm}^2$ ) | Power density ( $\mu\text{W}/\text{mm}^2$ ) |             |                  |            |                      |
| Fairphone 2                       | 1.3                                         | $6.0 * 10^{-4}$        | 1.4                                         | $6.0 * 10^{-4}$        | 0.8                                         | $6.0 * 10^{-4}$        | 3.6                                         | 1920 × 1080 | 446              | LCD        | 0.8                  |
| Honor 8                           | 1.8                                         | $5.0 * 10^{-4}$        | 2.1                                         | $5.0 * 10^{-4}$        | 2.1                                         | $5.0 * 10^{-4}$        | 6.6                                         | 1920 × 1080 | 424              | LCD        | 0.8                  |
| Motorola G5+                      | 1.3                                         | $1.0 * 10^{-3}$        | 2.0                                         | $1.0 * 10^{-3}$        | 1.8                                         | $1.0 * 10^{-3}$        | 5.8                                         | 1920 × 1080 | 441              | LCD        | 0.9                  |
| Motorola Moto G LTE               | 1.5                                         | $1.8 * 10^{-3}$        | 2.1                                         | $1.8 * 10^{-3}$        | 1.5                                         | $1.8 * 10^{-3}$        | 4.9                                         | 1280 × 720  | 294              | LCD        | 0.7                  |
| Nokia Lumia 930                   | 1.2                                         | $5.0 * 10^{-3}$        | 1.4                                         | $2.8 * 10^{-3}$        | 1.0                                         | $4.0 * 10^{-3}$        | 4.0                                         | 1920 × 1080 | 441              | OLED       | 1.2                  |
| Samsung Galaxy A70                | 0.9                                         | $1.5 * 10^{-3}$        | 1.8                                         | $7.0 * 10^{-4}$        | 1.0                                         | $1.0 * 10^{-3}$        | 3.6                                         | 2400 × 1080 | 393              | OLED       | 0.7                  |
| Samsung Galaxy S10+               | 1.8                                         | $5.0 * 10^{-4}$        | 2.3                                         | $3.0 * 10^{-4}$        | 1.4                                         | $4.0 * 10^{-4}$        | 5.9                                         | 3040 × 1440 | 522              | OLED       | 0.6                  |
| Samsung Galaxy S5 Neo             | 1.8                                         | $5.0 * 10^{-4}$        | 1.8                                         | $4.0 * 10^{-4}$        | 1.7                                         | $7.0 * 10^{-4}$        | 4.2                                         | 1920 × 1080 | 306              | OLED       | 0.9                  |
| Samsung Galaxy Tab A 9.7 (Tablet) | 1.3                                         | $1.3 * 10^{-2}$        | 1.9                                         | $1.3 * 10^{-2}$        | 1.6                                         | $1.3 * 10^{-2}$        | 5.0                                         | 1024 × 768  | 132              | LCD        | 1.3                  |
| Sony Xperia Z5                    | 1.9                                         | $1.0 * 10^{-3}$        | 2.8                                         | $1.0 * 10^{-3}$        | 2.8                                         | $1.0 * 10^{-3}$        | 7.1                                         | 1880 × 1040 | 424              | LCD        | 0.8                  |
| Xiaomi Mi 4i                      | 0.9                                         | $5.0 * 10^{-3}$        | 1.4                                         | $5.0 * 10^{-3}$        | 1.3                                         | $5.0 * 10^{-3}$        | 3.2                                         | 1880 × 1040 | 441              | LCD        | 0.9                  |

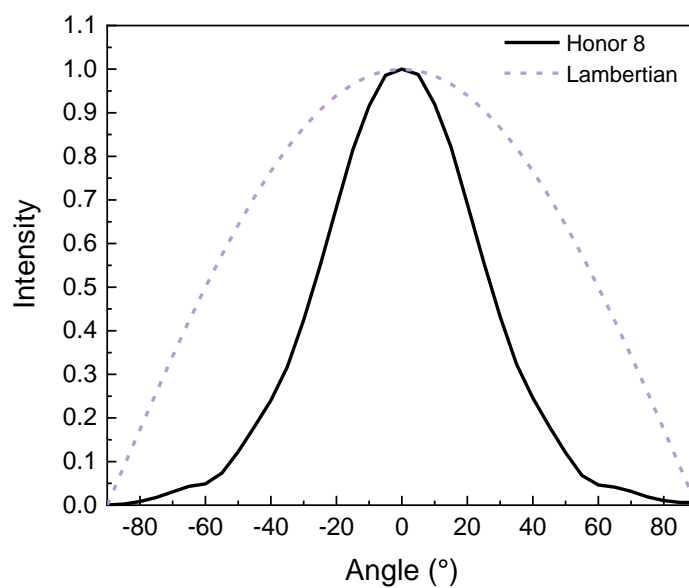

**Figure S2. Angular light intensity distribution of Honor 8 display** measured using a goniometer (black solid line) in comparison to Lambertian emission (purple dashed line).

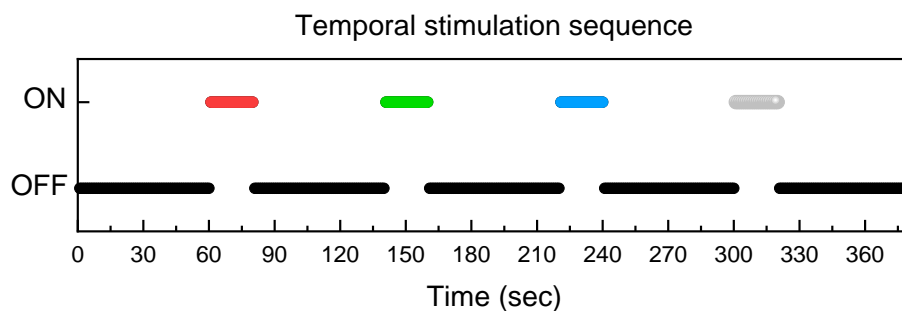

**Figure S3. Sketch of an exemplary stimulation sequence used for optogenetic stimulation of *OK6 > CsChrimson* larvae.** Stimulation sequence of red, green, blue, and white light for a period of 20 s with 60 s of rest (black period) between each stimulation colour.

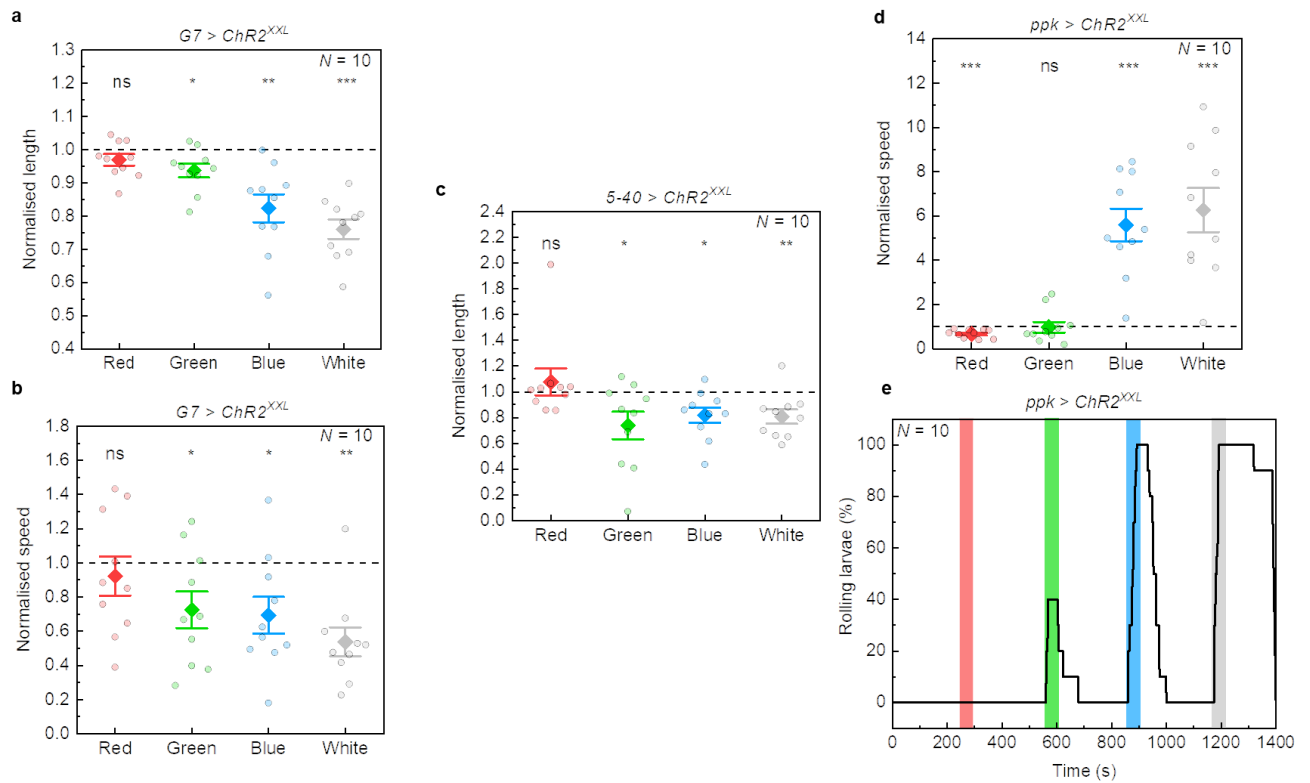

**Figure S4. Optogenetic activation of different sets of neurons under expression of  $ChR2^{XXL}$ .** a) Normalised length and b) Normalised speed of larvae expressing  $G7 > ChR2^{XXL}$ . Stimulation period: 20 s; black period: 250 s. c) Normalised length of larvae expressing  $5-40 > ChR2^{XXL}$ . Stimulation period: 20 s; black period: 240 s. d-e) Response of  $ppk > ChR2^{XXL}$  larvae upon optogenetic activation. d) Normalised speed and e) percentage of rolling larvae over time. Stimulation period: 20 s; black period: 240 s.  $N$ : number of larvae; whiskers: s.e.m.; diamonds: mean. Significance calculated via one-sample two-tailed t-test: ns: not significant ( $p > 0.05$ ), \*  $p < 0.05$ , \*\*  $p < 0.01$ , \*\*\*  $p < 0.001$ .

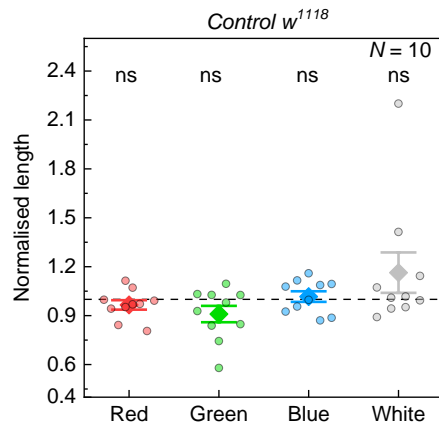

**Figure S5. Normalised length of *w<sup>1118</sup>* control larvae upon optogenetic stimulation.** Stimulation period: 20 s; black period: 30 s. *N*: number of larvae; whiskers: s.e.m.; diamonds: mean. Significance calculated via one-sample two-tailed t-test: ns: not significant ( $p > 0.05$ ).

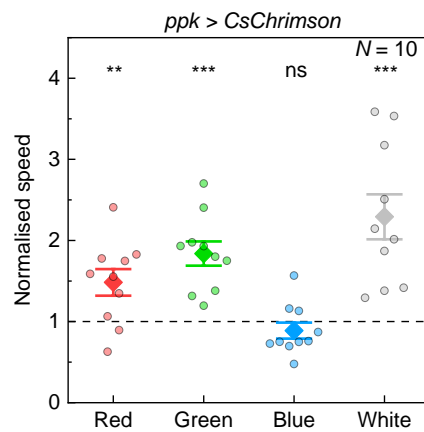

**Figure S6. Normalised speed of larvae expressing *ppk > CsChrimson* upon optogenetic stimulation.** Stimulation period: 20 s; black period: 40 s. *N*: number of larvae; whiskers: s.e.m.; diamonds: mean. Significance calculated via one-sample two-tailed t-test: ns: not significant ( $p > 0.05$ ), \*\*  $p < 0.01$ , \*\*\*  $p < 0.001$ .

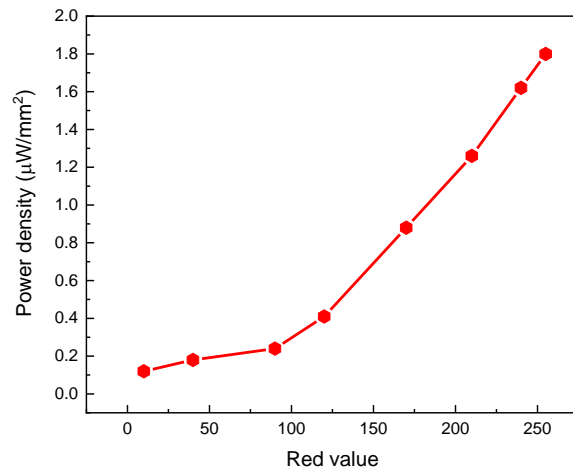

**Figure S7. Power density of the Honor 8 smartphone display as a function of the set RGB value for red emission from (0,0,0) to (255,0,0).**

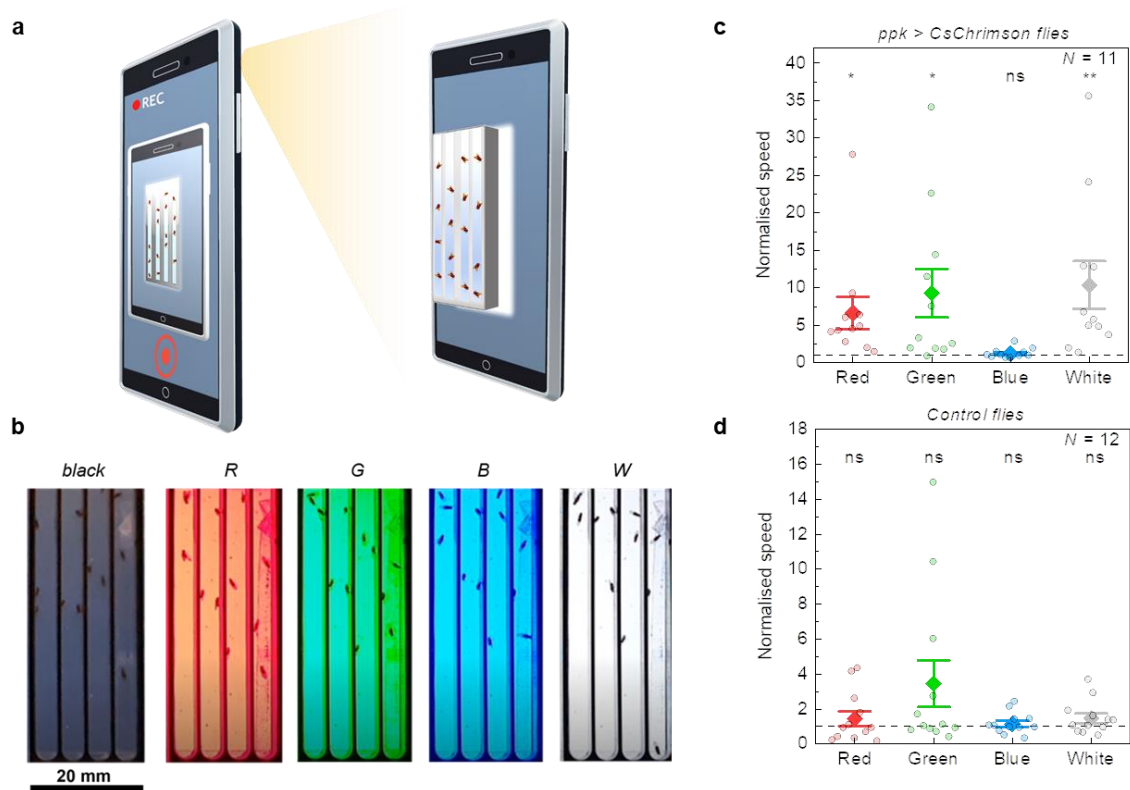

**Figure S8. Control of behaviour in adult *Drosophila* with smartphone illumination.** a) Sketch of the experimental setup used for stimulation of flies, which includes two smartphones (one for optogenetic stimulation and one for recording) and a chamber for containment of flies. b) Photographs of flies expressing *ppk > CsChrimson* during black periods and when stimulated with red, green, blue, and white light. c) Normalised speed of flies expressing *ppk > CsChrimson* in response to an illumination sequence with different colours for 30 s each with intermediate black periods of 40 s. Significant speed increase is observed in response to stimulation with red, green, and white light. d) Normalised speed of *w<sup>1118</sup>* control flies in response to illumination with different colours. Illumination period: 30 s; black period: 40 s. *N*: number of flies; whiskers: s.e.m.; diamonds: mean. Significance calculated via one-sample two-tailed t-test: ns: not significant ( $p > 0.05$ ), \*  $p < 0.05$ , \*\*  $p < 0.01$ .



**Video S1.** Inhibition of motor neurons in larvae expressing *OK6 > GtACR1* using white light.

**Video S2.** Activation of muscles in larvae expressing *G7 > ChR2<sup>XXL</sup>* with white light.

**Video S3.** Activation of class IV multidendritic neurons in larvae expressing *ppk > ChR2<sup>XXL</sup>* with white light. Video accelerated to 3× speed.

**Video S4.** Guidance of a free-behaving *ppk > CsChrimson* larva using a ring of white light that moves at a speed of 0.17 mm/s in *x*-direction. Video accelerated to 25× speed. The red line indicates the track of the larval head.

**Video S5.** Observation of a free-behaving *w<sup>1118</sup>* control larva using a ring of white light that moves at a speed of 0.17 mm/s in *x*-direction. Video accelerated to 25× speed. The red line indicates the track of the larval head.

**Video S6.** Confinement of 11 *ppk > CsChrimson* larvae inside a black maze surrounded by white light. Video accelerated to 125× speed. Coloured lines show tracks of the larvae.

**Video S7.** Video recording of 10 *w<sup>1118</sup>* control larvae inside a black maze surrounded by white light. Video accelerated to 125× speed. Coloured lines show tracks of the larvae.

**Video S8.** Climbing assay of *w<sup>1118</sup>* control flies (left) and *ppk > CsChrimson* flies (right) stimulated with white light. Video accelerated to 3× speed.
